# Supplementary material for: Scrutinizing the triad of Vibrio tapetis, the skin barrier and pigmentation as determining factors in the development of skin ulcerations in wild common dab (Limanda limanda)
Source: Springer Nature journal article supplement (doi:10.1186/s13567-019-0659-6), 2019-06-03

# Experimental groups

## Challenge group

(Bath immersion *Vibrio tapetis*)

## Control group

(Sham-inoculation)

Replicate 1  
(12 fish)

Replicate 2  
(12 fish)

Replicate 3  
(12 fish)

Replicate 1  
(12 fish)

Replicate 2  
(12 fish)

Subgroup 1

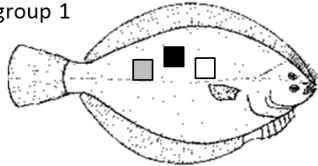

Subgroup 2

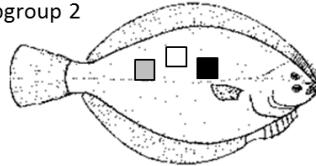

Subgroup 3

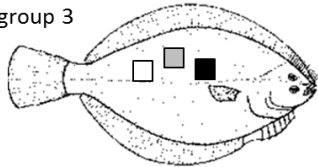

Subgroup 4

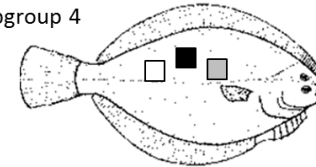

Subgroup 5

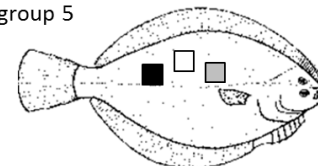

Subgroup 6

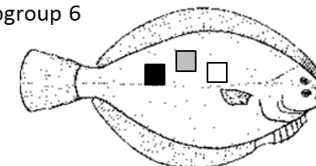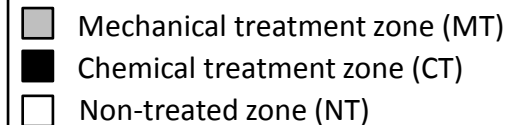

Supplement: MOESM1 [file 13567_2019_659_MOESM1_ESM.pdf]
