# Supplementary material for: Scrutinizing the triad of Vibrio tapetis, the skin barrier and pigmentation as determining factors in the development of skin ulcerations in wild common dab (Limanda limanda)
Source: Springer Nature journal article supplement (doi:10.1186/s13567-019-0659-6), 2019-06-03

Mortality (%)

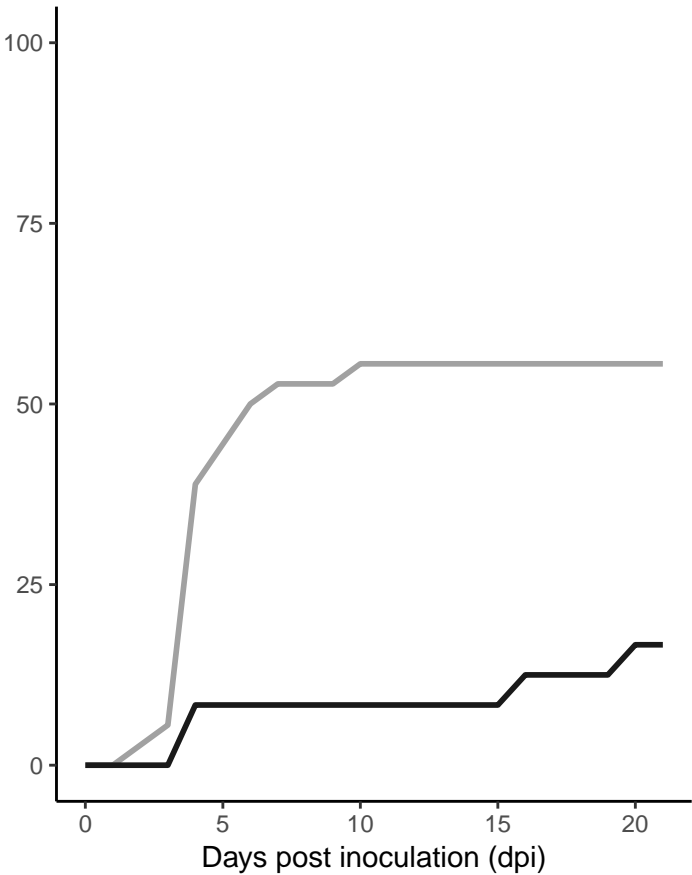

Supplement: MOESM3 [file 13567_2019_659_MOESM3_ESM.pdf]
